# Supplementary material for: A Simple, Green Method to Fabricate Composite Membranes for Effective Oil-in-Water Emulsion Separation
Source: MDPI journal article supplement (doi:10.3390/polym10030323), 2018-03-15
Supplement: s1 [file s1]

## Supporting Information (SI)

### A Simple, Green Method to Fabricate Composite Membranes for Effective Oil-in-Water Emulsion Separation

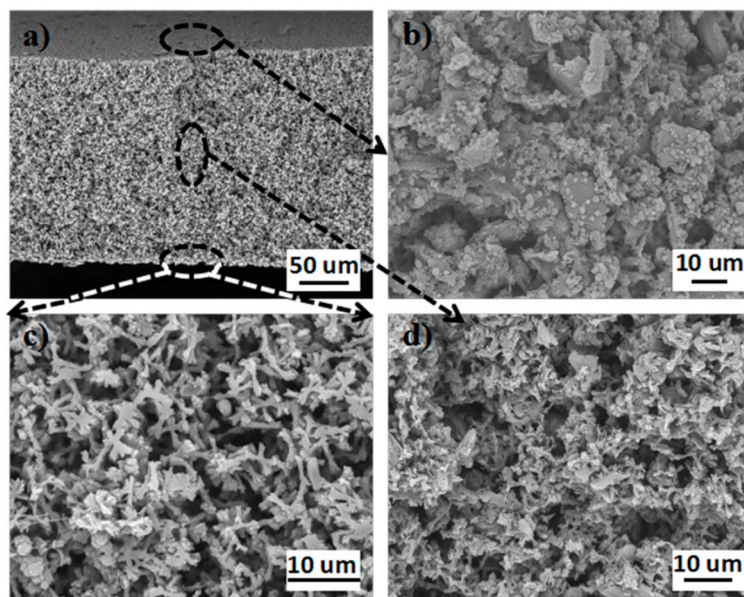

**Figure S1.** SEM images of cross section (a,d), top surface (b), and bottom surface (c) of the CSPNM.

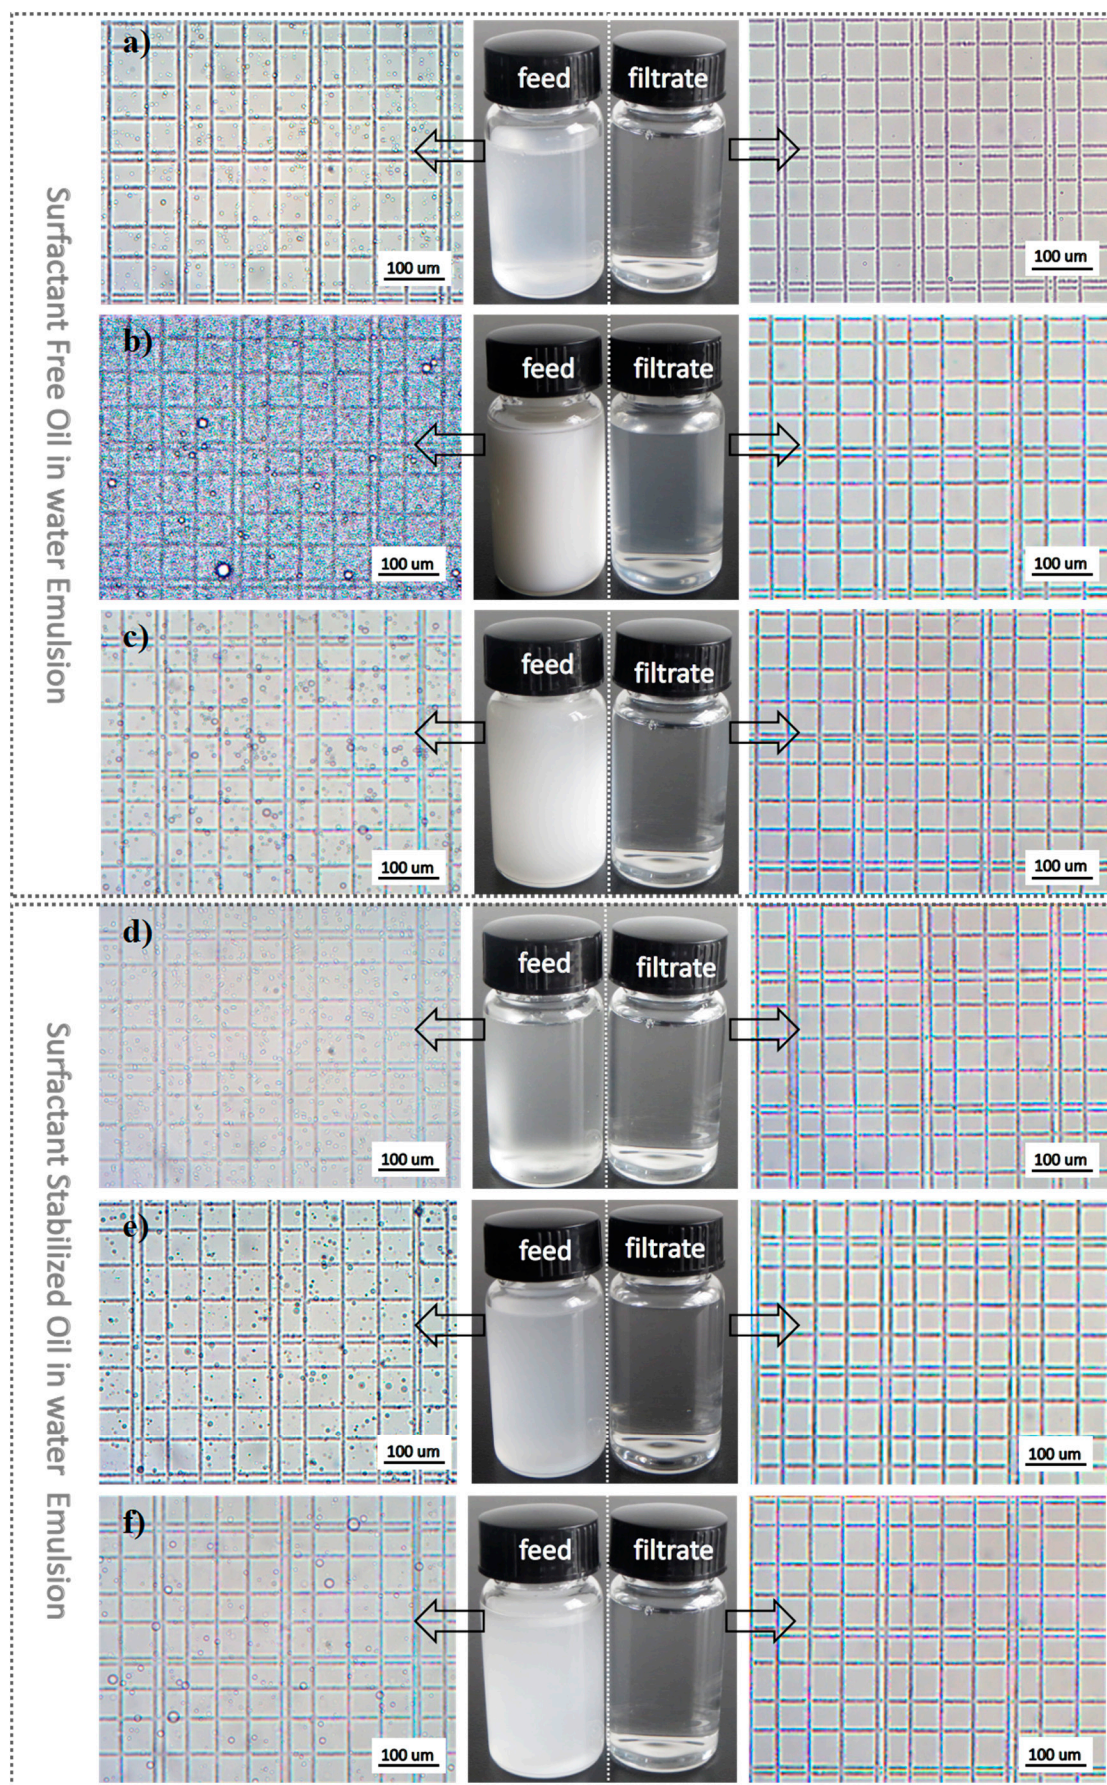

**Figure S2.** Separation results for various surfactant-free oil-in-water emulsions:

n-hexane-in-water (H/W) (**a**), toluene-in water (T/W) (**c**), and diesel-in-water emulsion (D/W) (**e**). Separation results for various surfactant-stabilized oil-in-water emulsions: n-hexane-in-water (S/H/W) (**b**), toluene-in water (S/T/W) (**d**), and diesel-in-water emulsion (S/D/W) (**f**). All the filtrates become transparent and no droplet is observed in the corresponding optical image.

**Table S1.** Oil rejection of the CSPNM and content in the feed solutions.

| Emulsion                    | Content of oil in feed<br>solutions (mg/L) | Rejection of the<br>CSPNM (%) |
|-----------------------------|--------------------------------------------|-------------------------------|
| n-hexane -in- water (H/W)   | 12200                                      | 99.75                         |
| n-hexane -in- water (T/H/W) | 23600                                      | 99.85                         |
| toluene -in- water (T/W)    | 12840                                      | 99.68                         |
| toluene -in- water (T/T/W)  | 23650                                      | 99.84                         |
| diesel -in- water (D/W)     | 33360                                      | 99.79                         |
| diesel -in- water (T/D/W)   | 24730                                      | 99.84                         |



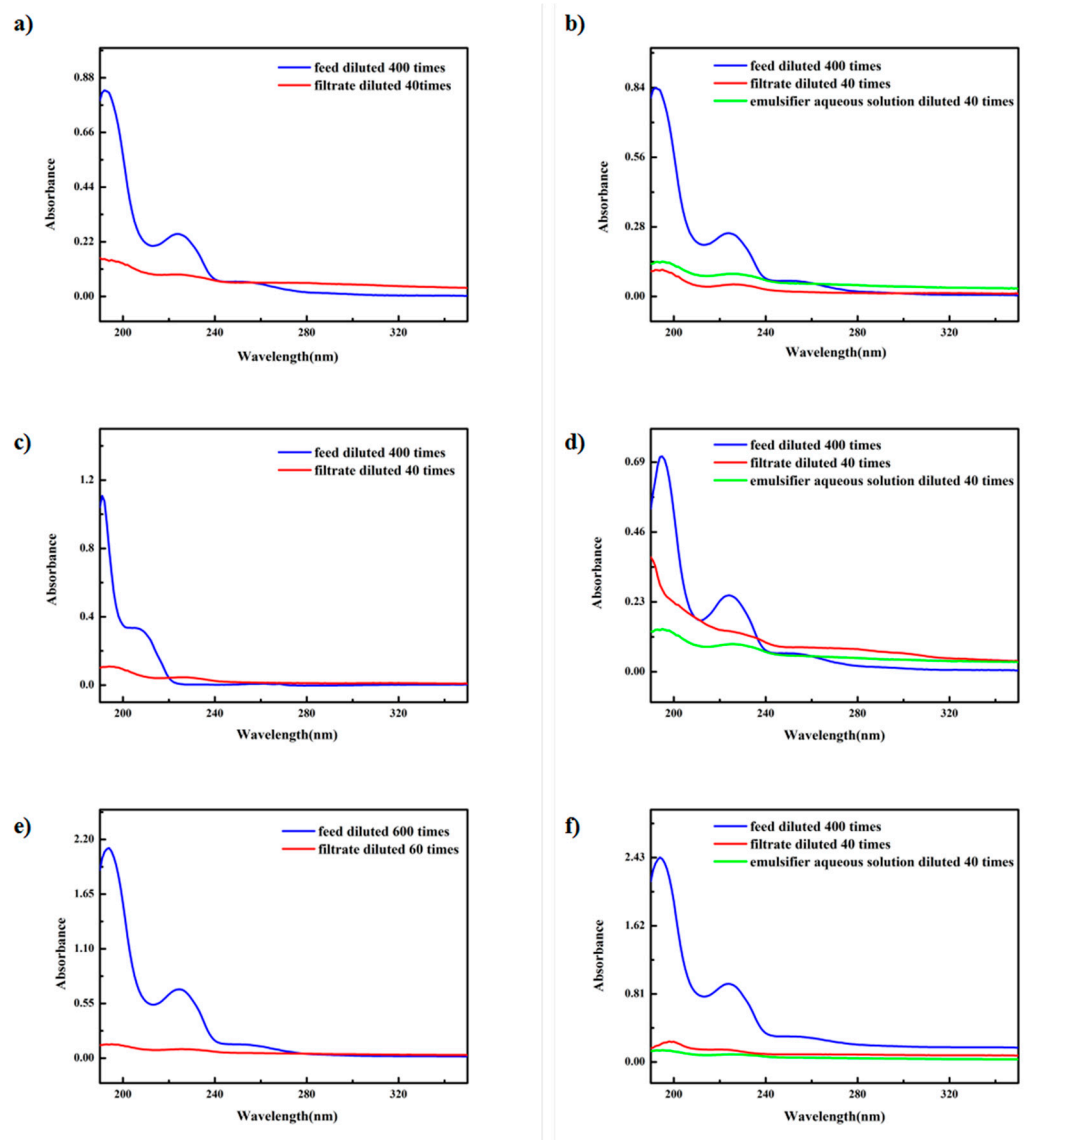

**Figure S3.** UV-VIS spectra for n-hexane-in-water emulsion (H/W) (a), n-hexane-in-water emulsion (T/H/W) (b), toluene-in-water emulsion (T/W) (c), toluene-in-water emulsion (T/T/W) (d), diesel-in-water emulsion (D/W) (e), and diesel-in-water emulsion (T/D/W) (f).
